# Supplementary material
Source: ML conference proceedings conference paper supplement (https://proceedings.mlr.press/v139/mastakouri21a.html)
Supplement: Supplementary file 1 [file mastakouri21a-supp.zip]

Archive with 2 entries (2 files):
- poster_icml2021_1008.pdf
- supplementary_material_id_1008.pdf
