# Supplementary material
Source: ML conference proceedings conference paper supplement (https://proceedings.mlr.press/v139/mastakouri21a.html)
Supplement: Supplementary file 1 [file mastakouri21a-supp.zip › poster_icml2021_1008.pdf]

# Necessary and Sufficient Conditions for Causal Feature Selection in Time Series with Latent Common Causes

Atalanti A. Mastakouri<sup>1</sup>, Bernhard Schölkopf<sup>1,2</sup>, Dominik Janzing<sup>1</sup>

<sup>1</sup>Amazon Research, AWS Causality Team, Tübingen <sup>2</sup>Max Planck Institute for Intelligent Systems, Empirical Inference Department, Tübingen

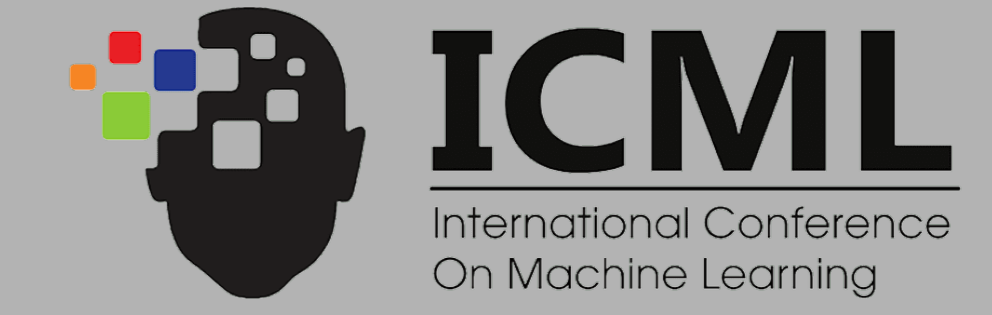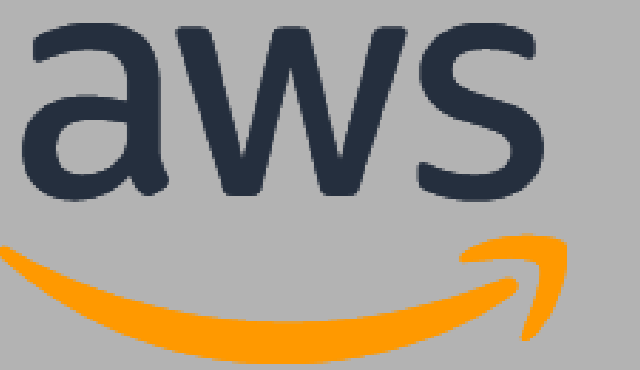

## Overview

- Given observed time series and a target time series, is it possible to identify its causes? Under which assumptions?
- Goal:** Define **necessary** and **sufficient** conditions for causal feature selection in time series with latent common causes under some graph constraint.

## Formal problem description

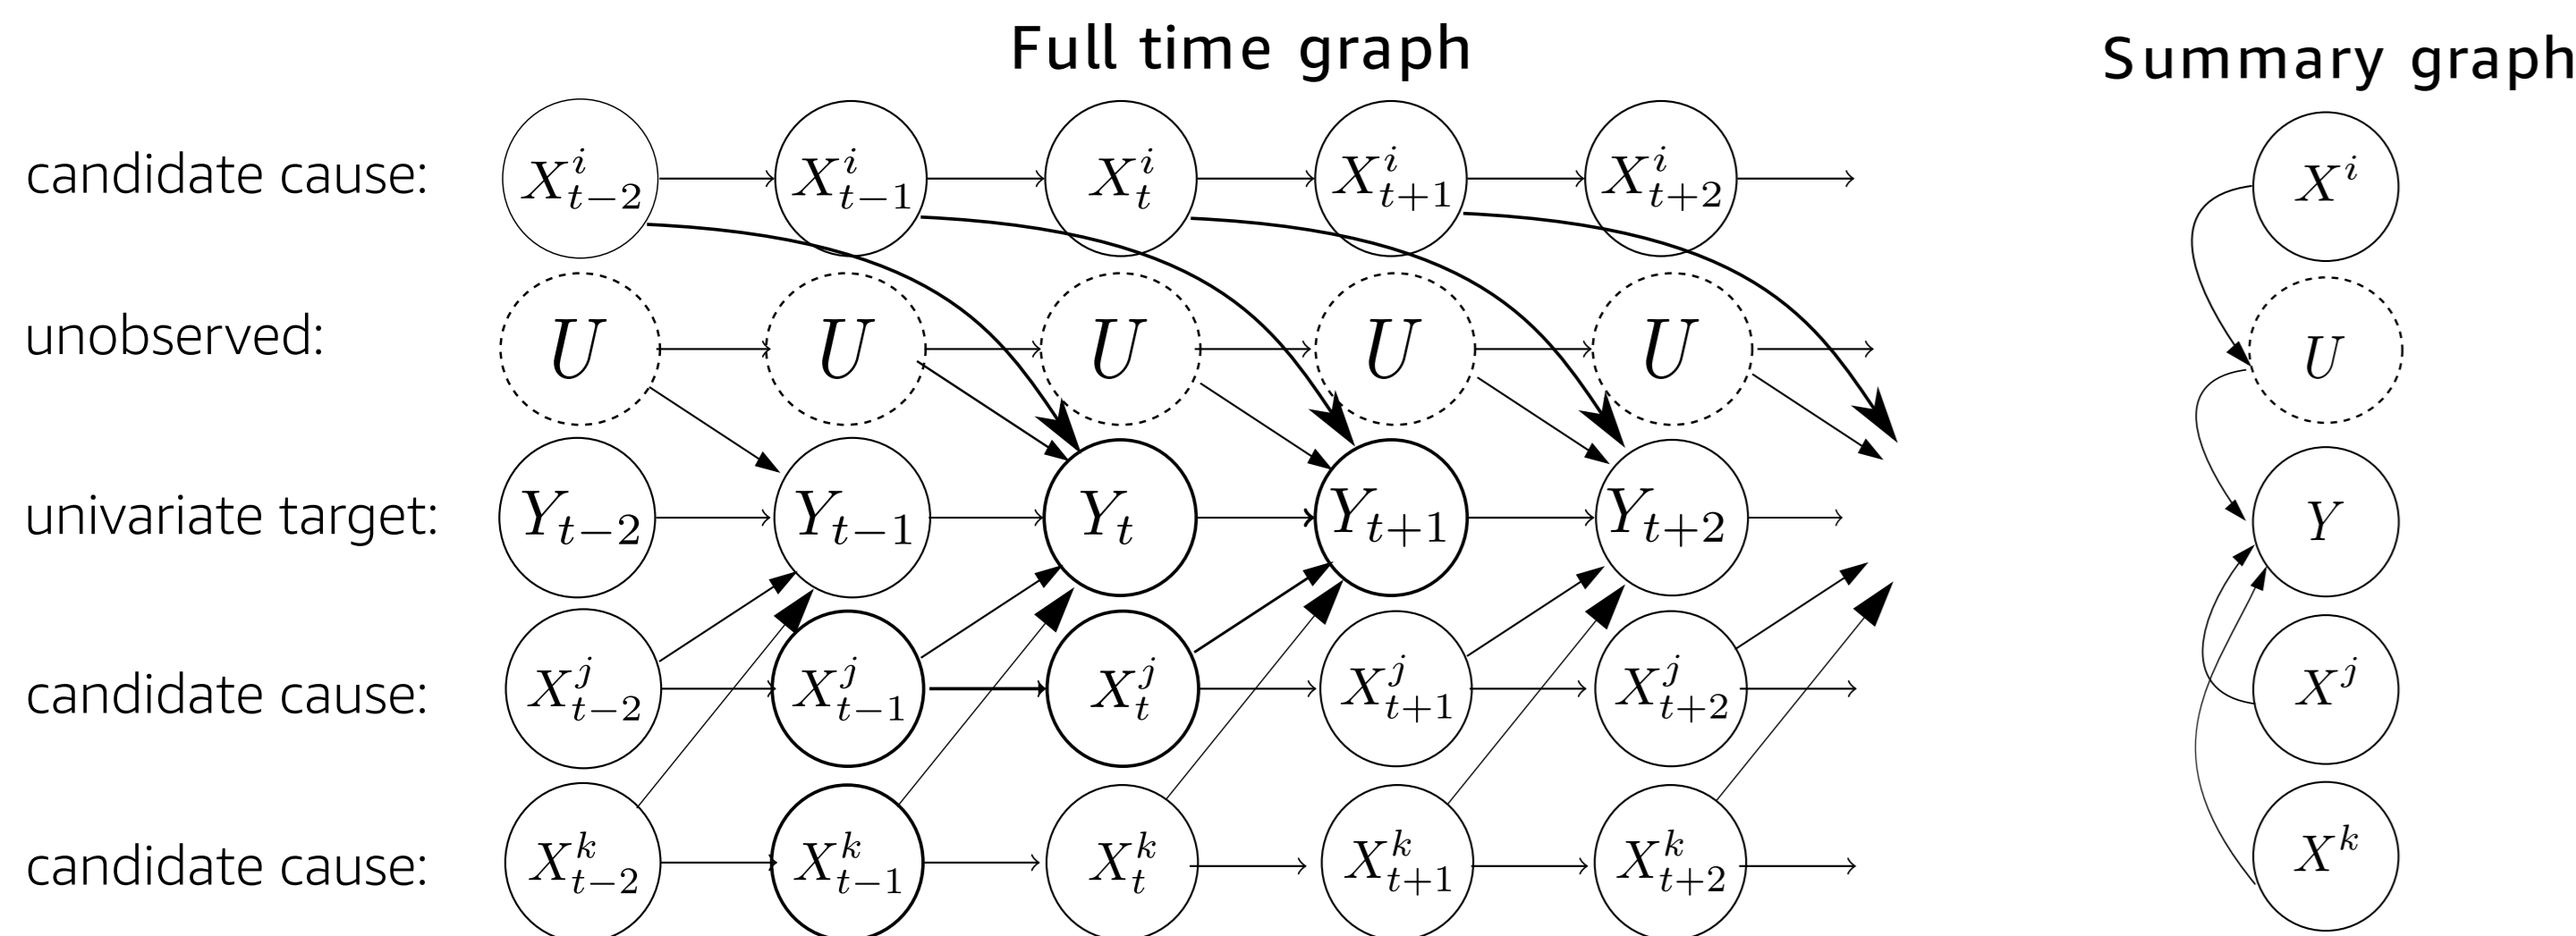

## Intuition

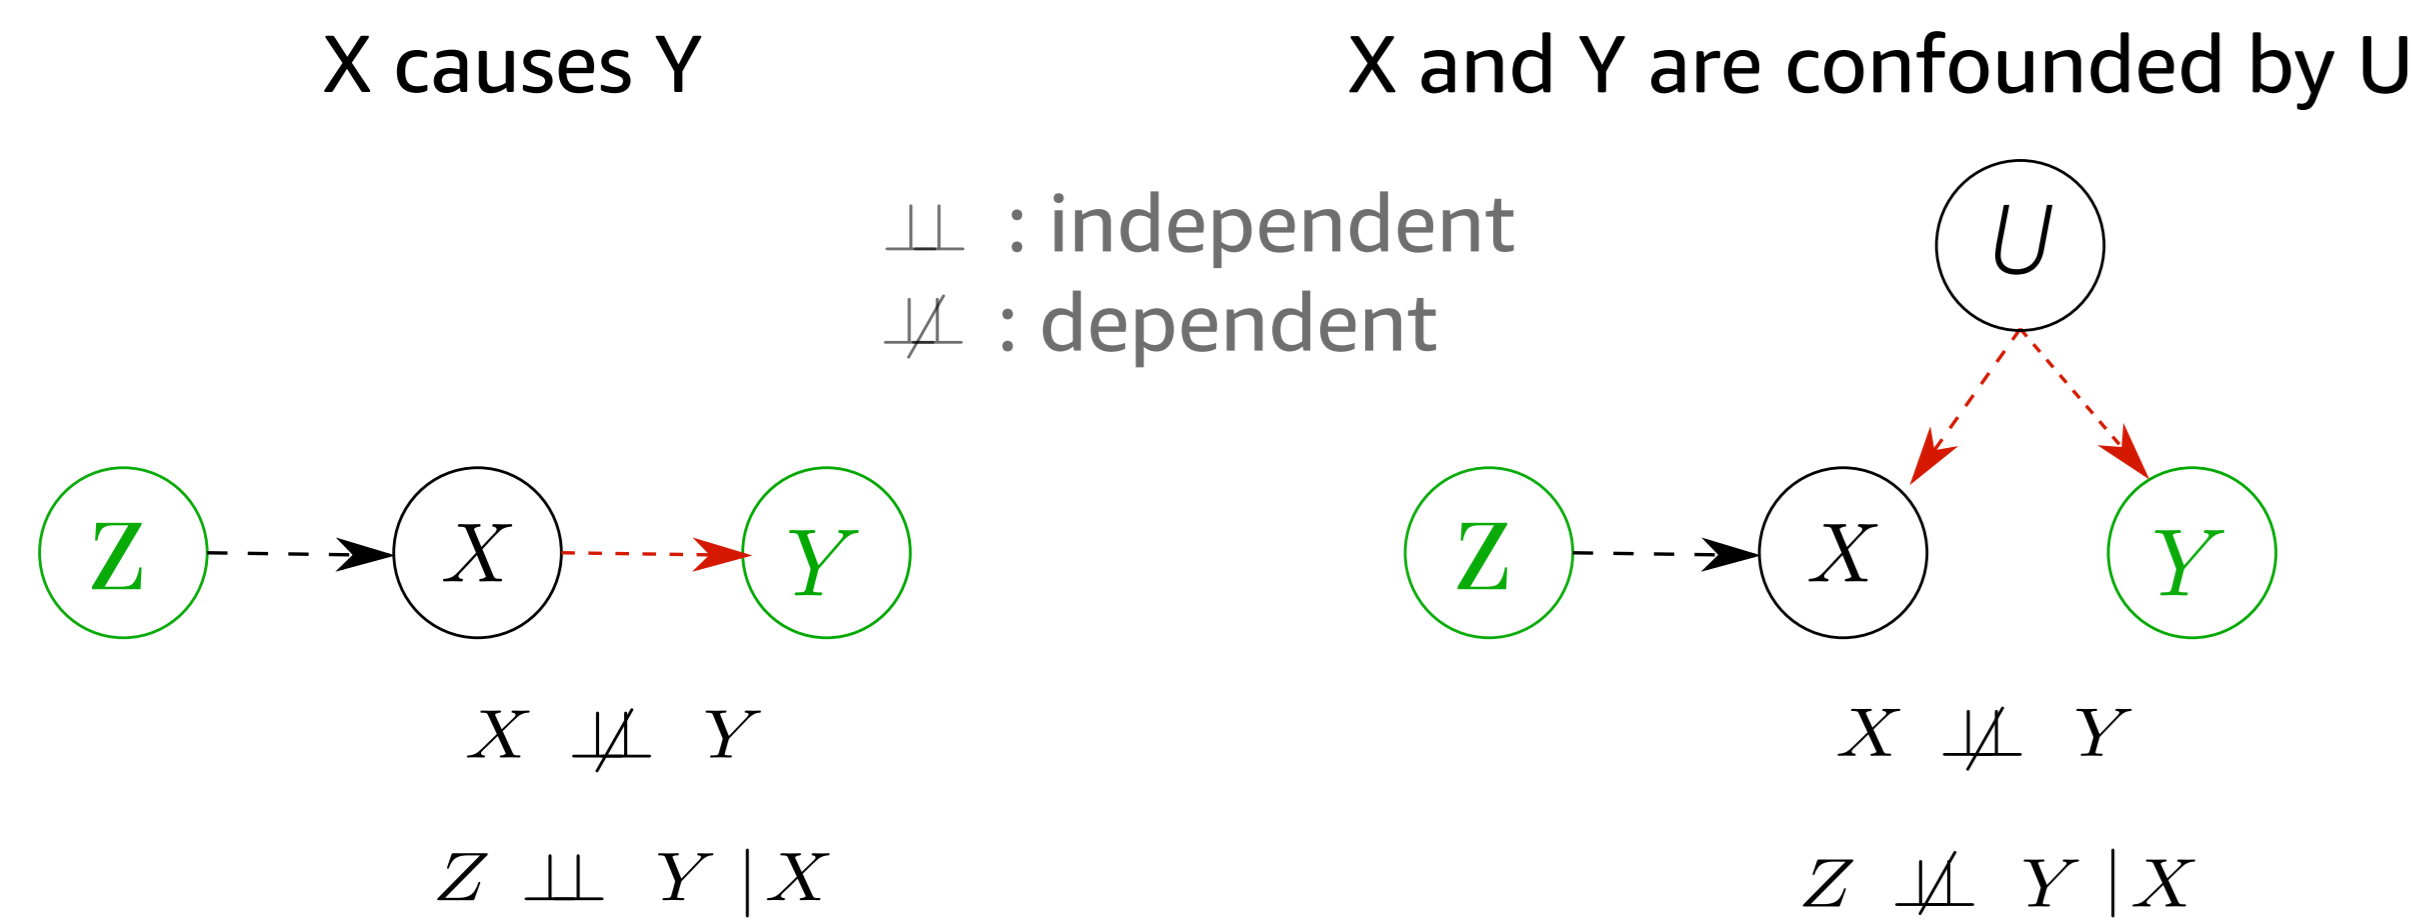

- The two graphs entail different patterns of conditional independences. [5]
- Finding different patterns of conditional independences in time series is more complex and requires conditioning on a larger **conditioning set**.

## Issues of existing methods which we want to avoid

- Exclude hidden common causes** (PCMCi [7], Granger [2])
- Need to have interventions on the system** (seqICP [6])
- Require large conditioning sets (SVAR-FCI [4], tsFCI [1]) → **low statistical strength**
- Require exhaustive conditional independence tests → **low statistical strength**

## Finding conditional independence patterns in time series

By conditioning on the purple nodes we find similar characteristic patterns of conditional independences which hold true only when  $X \rightarrow Y$

### Conditioning set

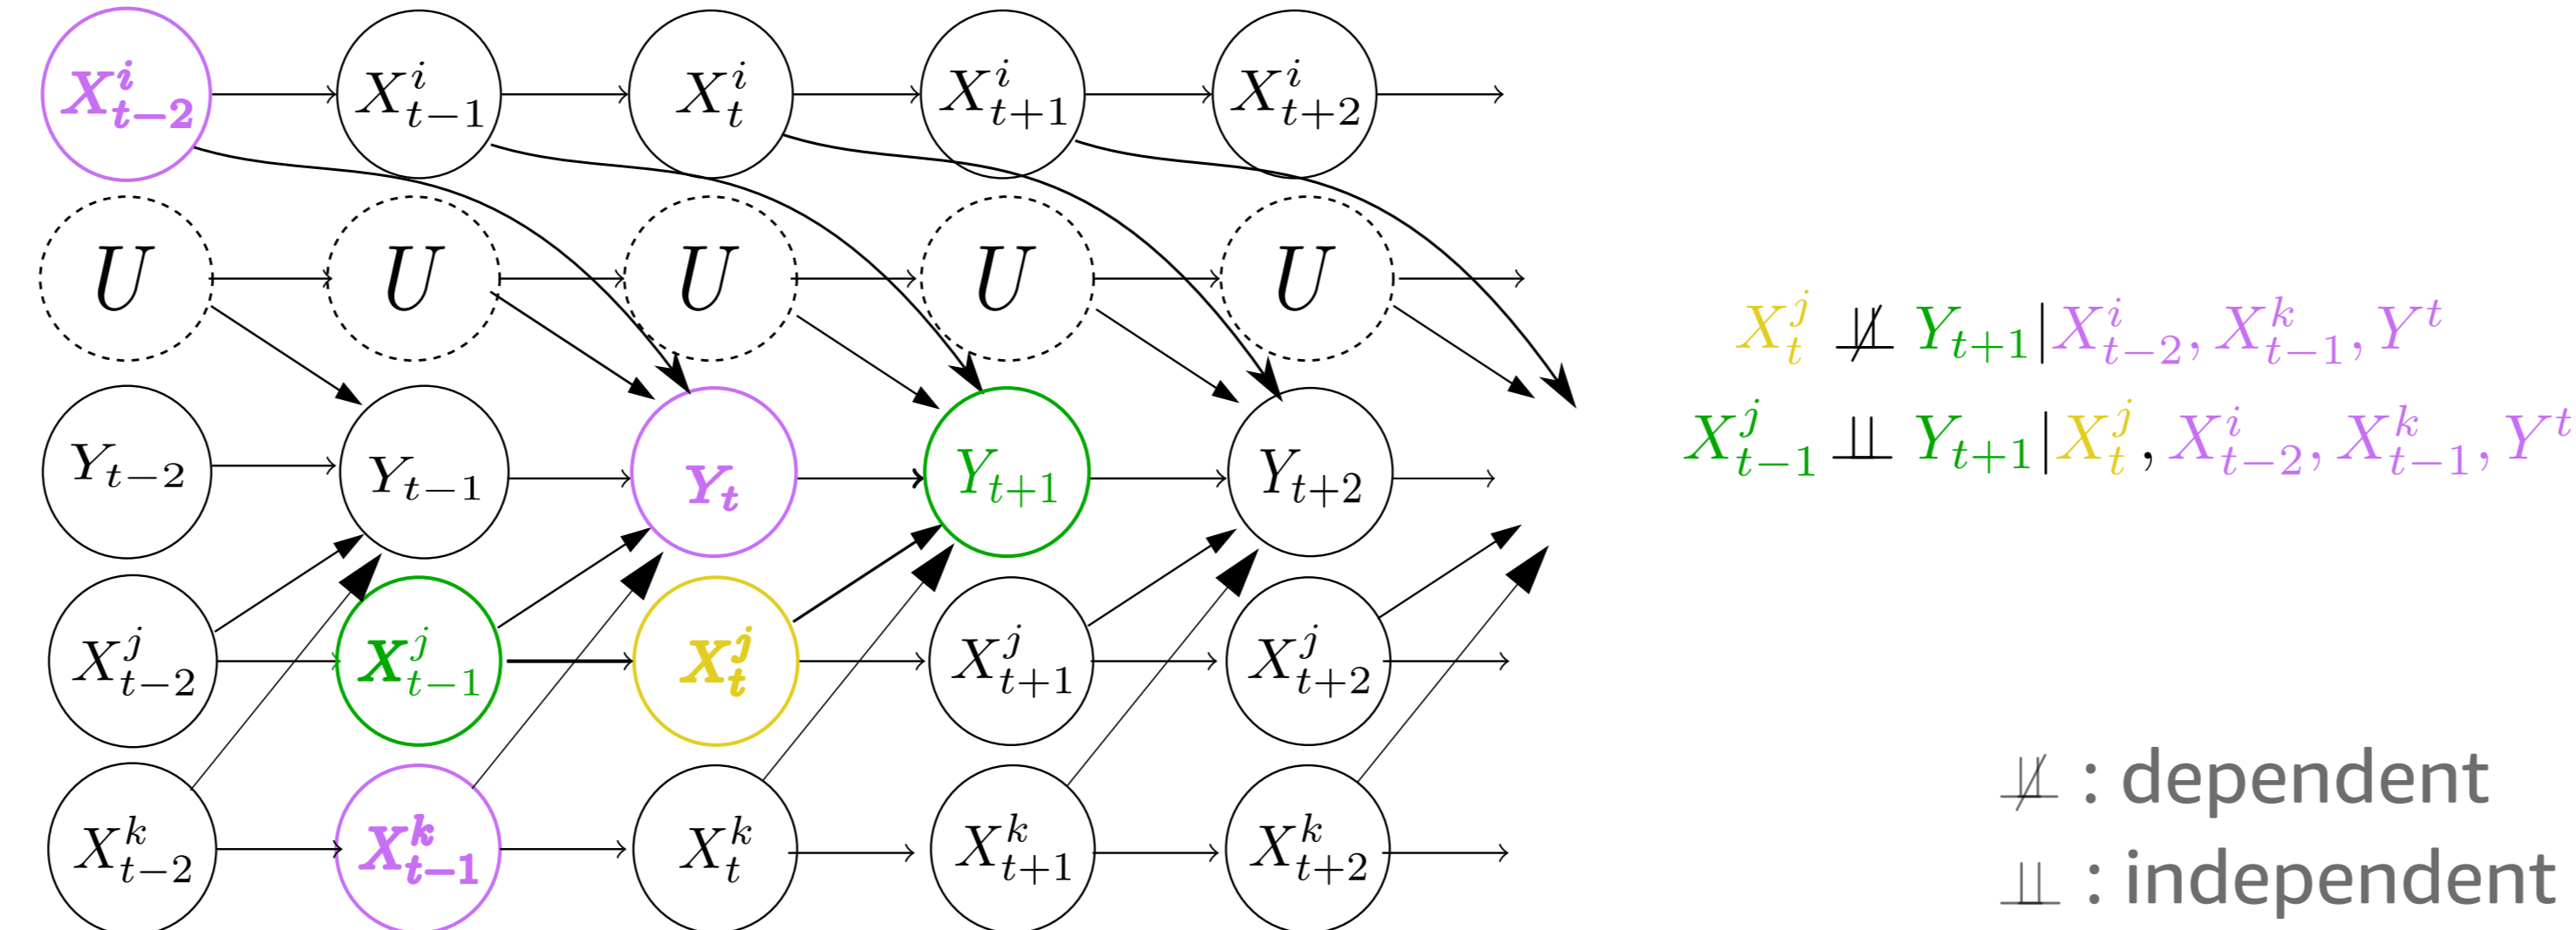

### Theorem (Sufficient conditions for a direct or indirect sg-unconfounded cause of $Y$ in single-lag dependency graphs)

Assuming A1-A9 (see paper) and single-lag dependency graphs, let  $w_i$  be the minimum lag between  $X^i$  and  $Y$ . Further, let  $w_{ij} := w_i - w_j$ . Then, for every time series  $X^i \in X$  we define a conditioning set  $S^i = \{X^1_{t+w_{i1}-1}, X^2_{t+w_{i2}-1}, \dots, X^{i-1}_{t+w_{i,i-1}-1}, X^{i+1}_{t+w_{i,i+1}-1}, \dots, X^n_{t+w_{in}-1}\}$ . If

$$X^i_t \not\perp\!\!\!\perp Y_{t+w_i} | \{S^i, Y_{t+w_i-1}\} \quad (1)$$

and

$$X^i_{t-1} \perp\!\!\!\perp Y_{t+w_i} | \{S^i, X^i_t, Y_{t+w_i-1}\} \quad (2)$$

are true, then

$$X^i_t \dashrightarrow Y_{t+w_i}$$

and the path between the two nodes is sg-unconfounded.

### Theorem (Necessary conditions for a direct sg-unconfounded cause of $Y$ in single-lag graphs)

Let the assumptions and the definitions of the previous Theorem hold. If  $X^i_t$  is a direct, “sg-unconfounded” cause of  $Y_{t+w_i}$  ( $X^i_t \rightarrow Y_{t+w_i}$ ), then cond. 1 and 2 of the previous Theorem hold.

## Efficient conditioning set

- The resulting conditioning set  $\{S^i, Y_{t+w_i-1}, X^i_t\}$  contains covariates that enter the outcome node  $Y_{t+w_i-1}$ , and not the potential cause  $X^i_{t-1}$ .
- Adjustment sets that include **parents of the potential cause** node are considered **inefficient**, as they can reduce the variance of the cause if they are strongly correlated with it, and thus reduce the signal [3].
- On the other hand, adding **nodes that explain variance in the outcome node** (precision variables) can contribute to a **better signal to noise ratio** for the dependences under consideration.
- Therefore, our choice of conditioning set could also **strengthen the statistical outcome**.

## Algorithm

```

Input:  $X, Y$ .
Output: causes_of_Y
 $nvars = \text{shape}(X, 1)$ ; causes_of_Y = []
 $w = \min\_lags(X, Y)$ 
for  $i = 1$  to  $nvars$  do
     $S_i = \bigcup_{j=1, j \neq i}^{nvars} \{X^j_{t+w[i]-w[j]-1}\}$ 
     $pvalue1 = \text{cond\_ind\_test}(X^i_t, Y_{t+w[i]}, |S_i, Y_{t+w[i]-1}|)$ 
    if  $pvalue1 < \text{threshold1}$  then
         $pvalue2 = \text{cond\_ind\_test}(X^i_{t-1}, Y_{t+w[i]}, |S_i, X^i_t, Y_{t+w[i]-1}|)$ 
        if  $pvalue2 > \text{threshold2}$  then
            causes_of_Y = [causes_of_Y,  $X^i$ ]
    end
end
    
```

Algorithm 1: SyPI

## SyPI on real world data

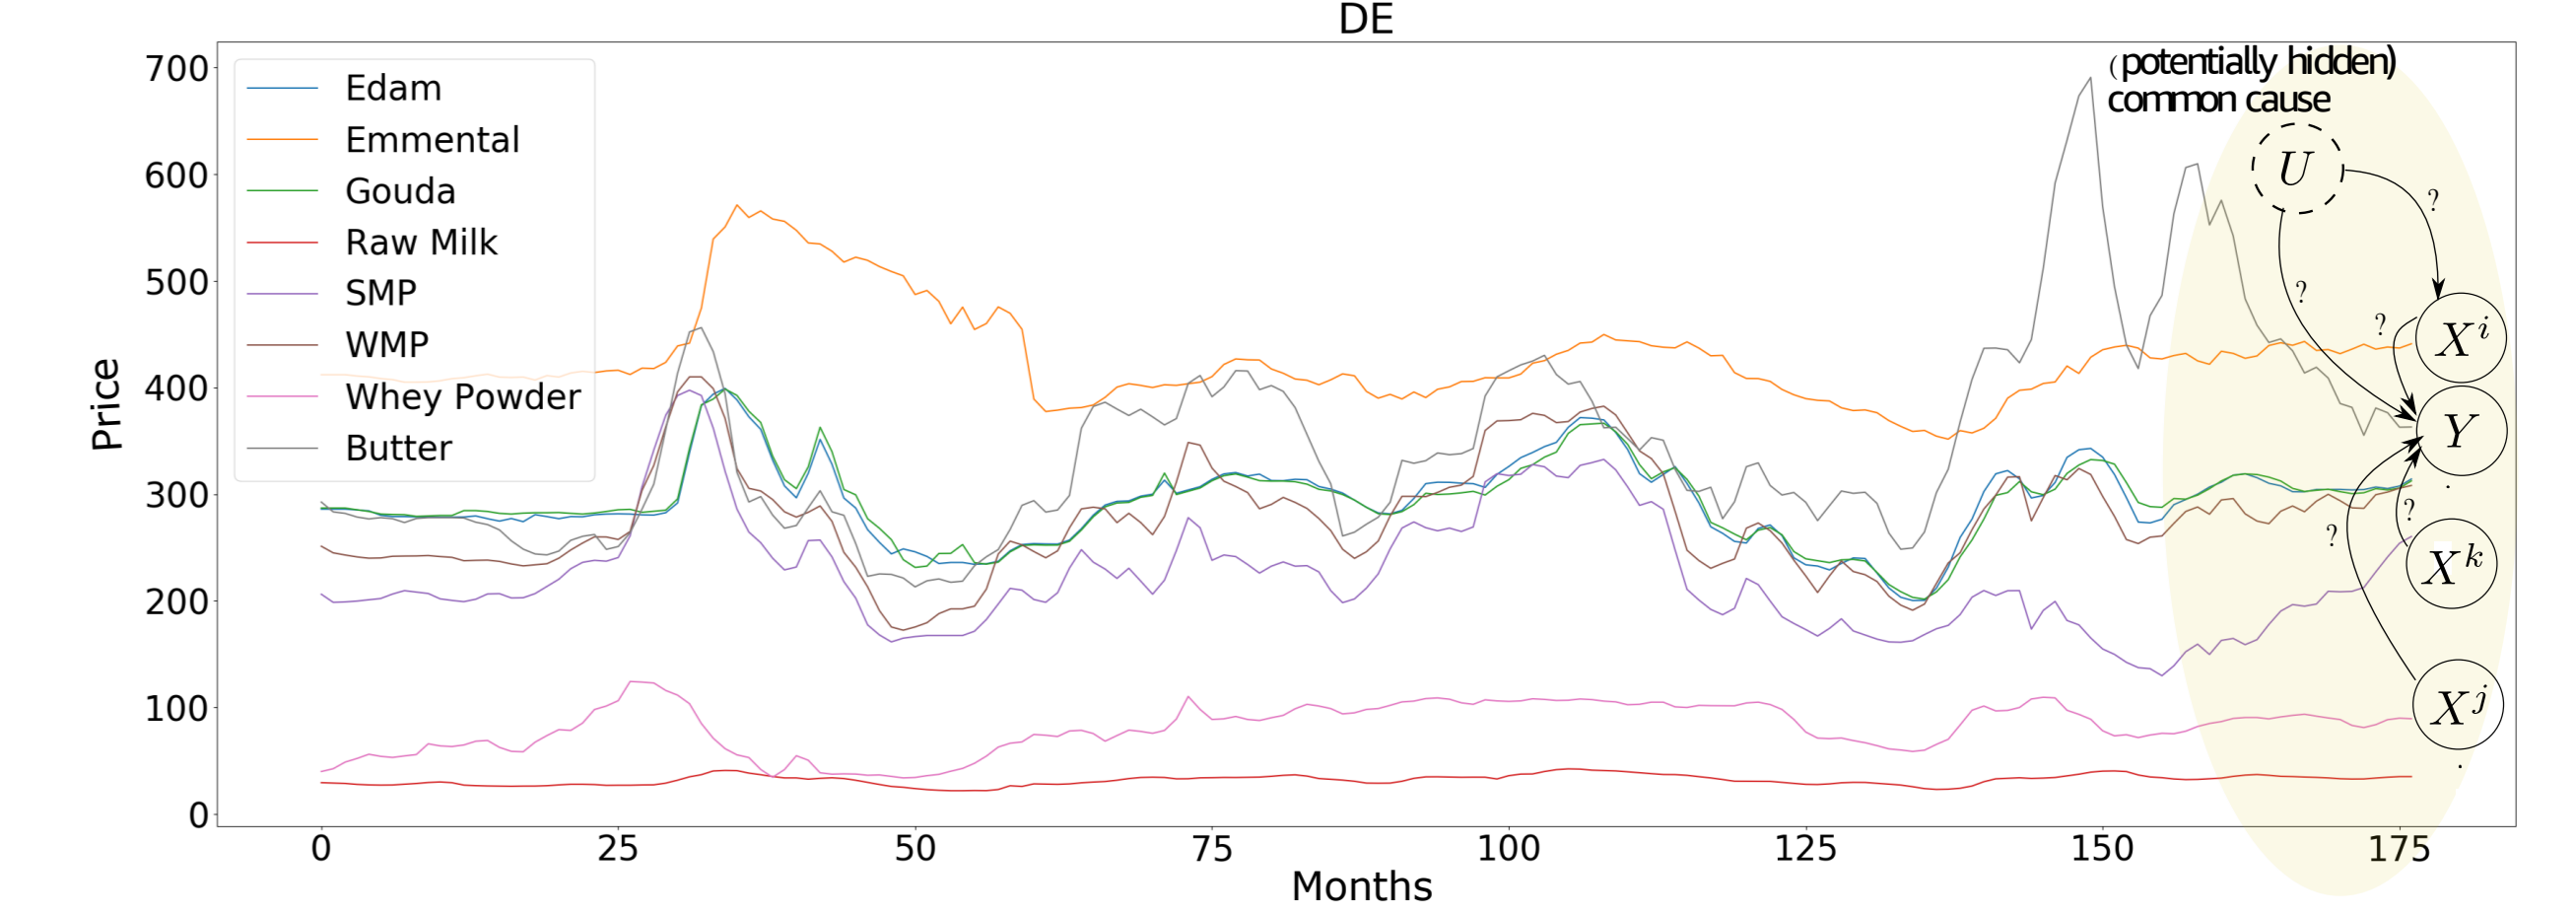

Ground truth (DE): Dataset with Raw milk

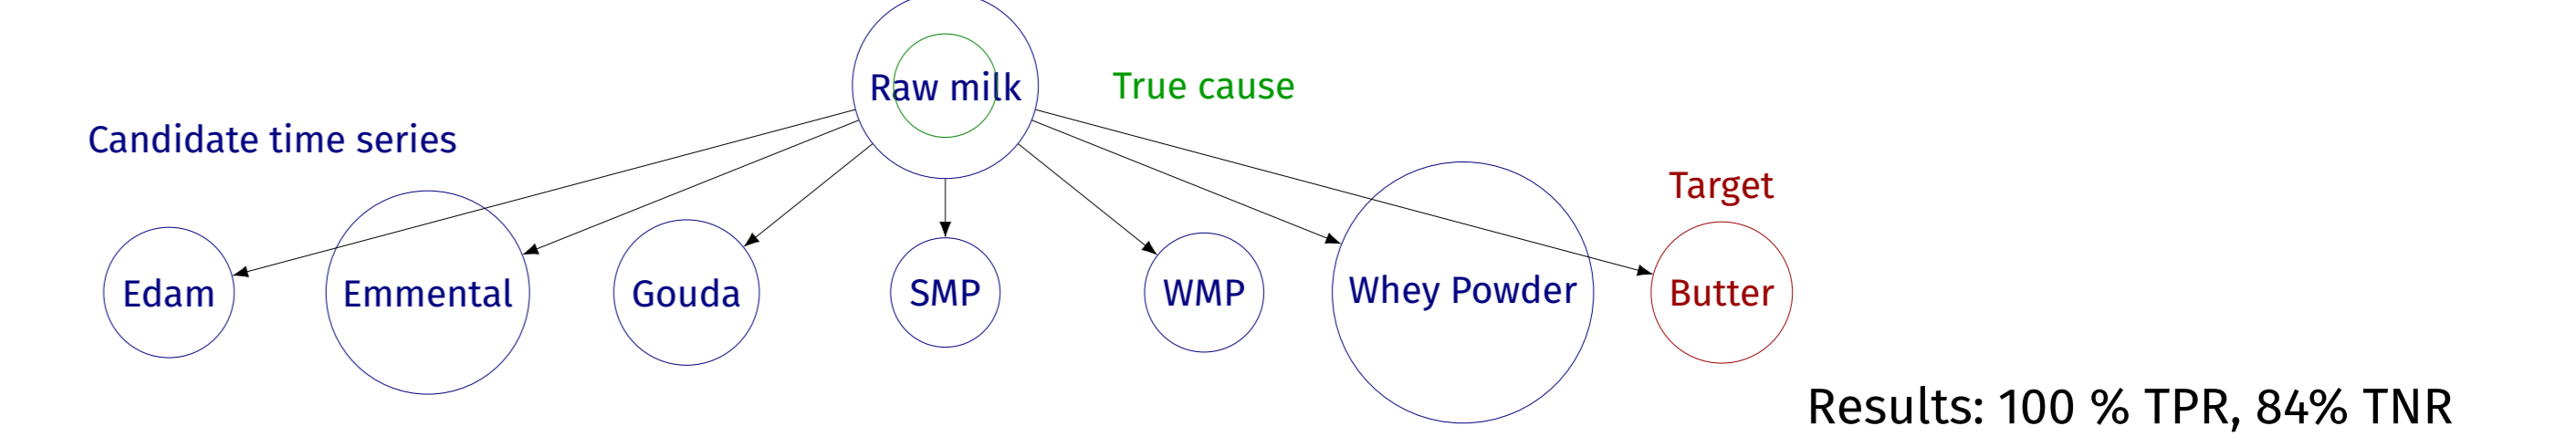

Ground truth (IE):

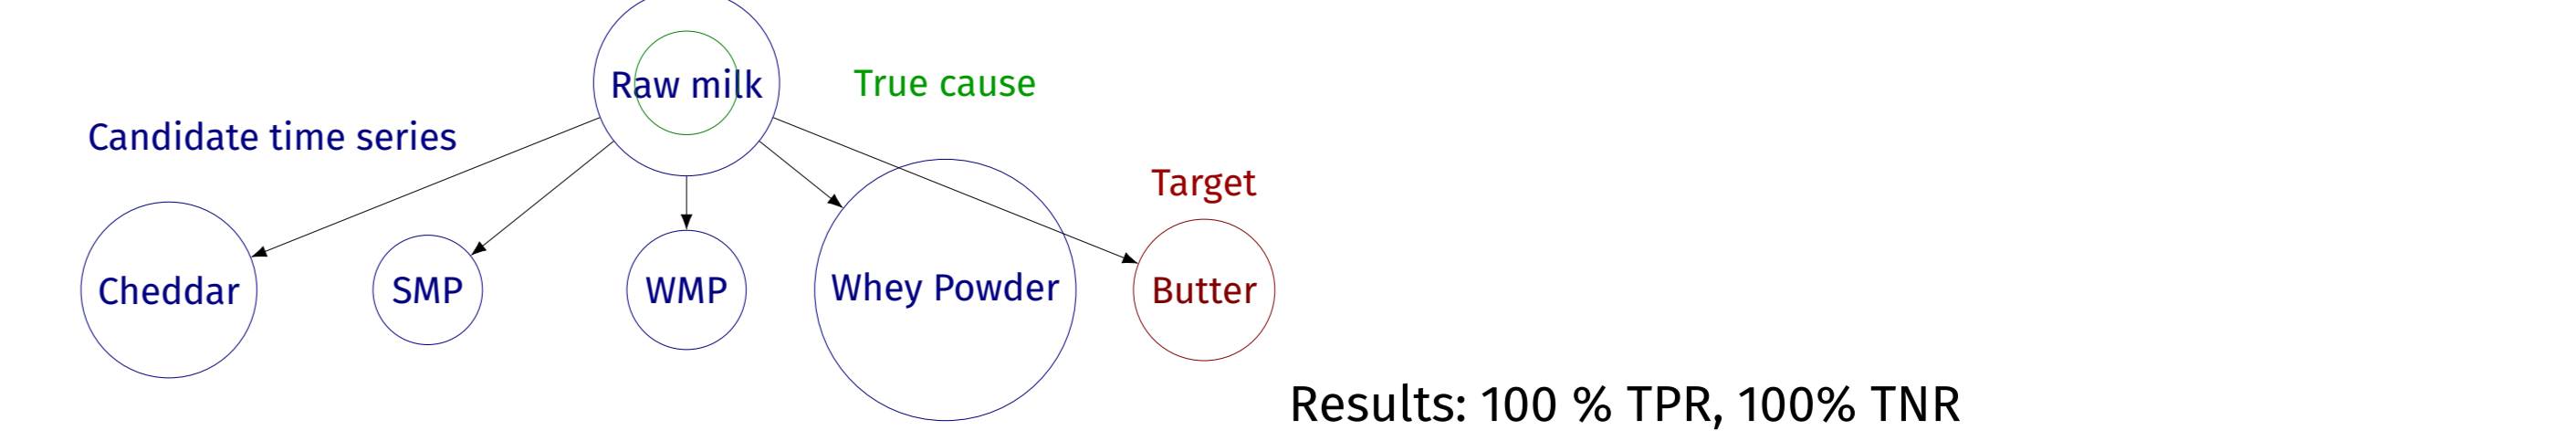

Ground truth (UK): Dataset without Raw milk

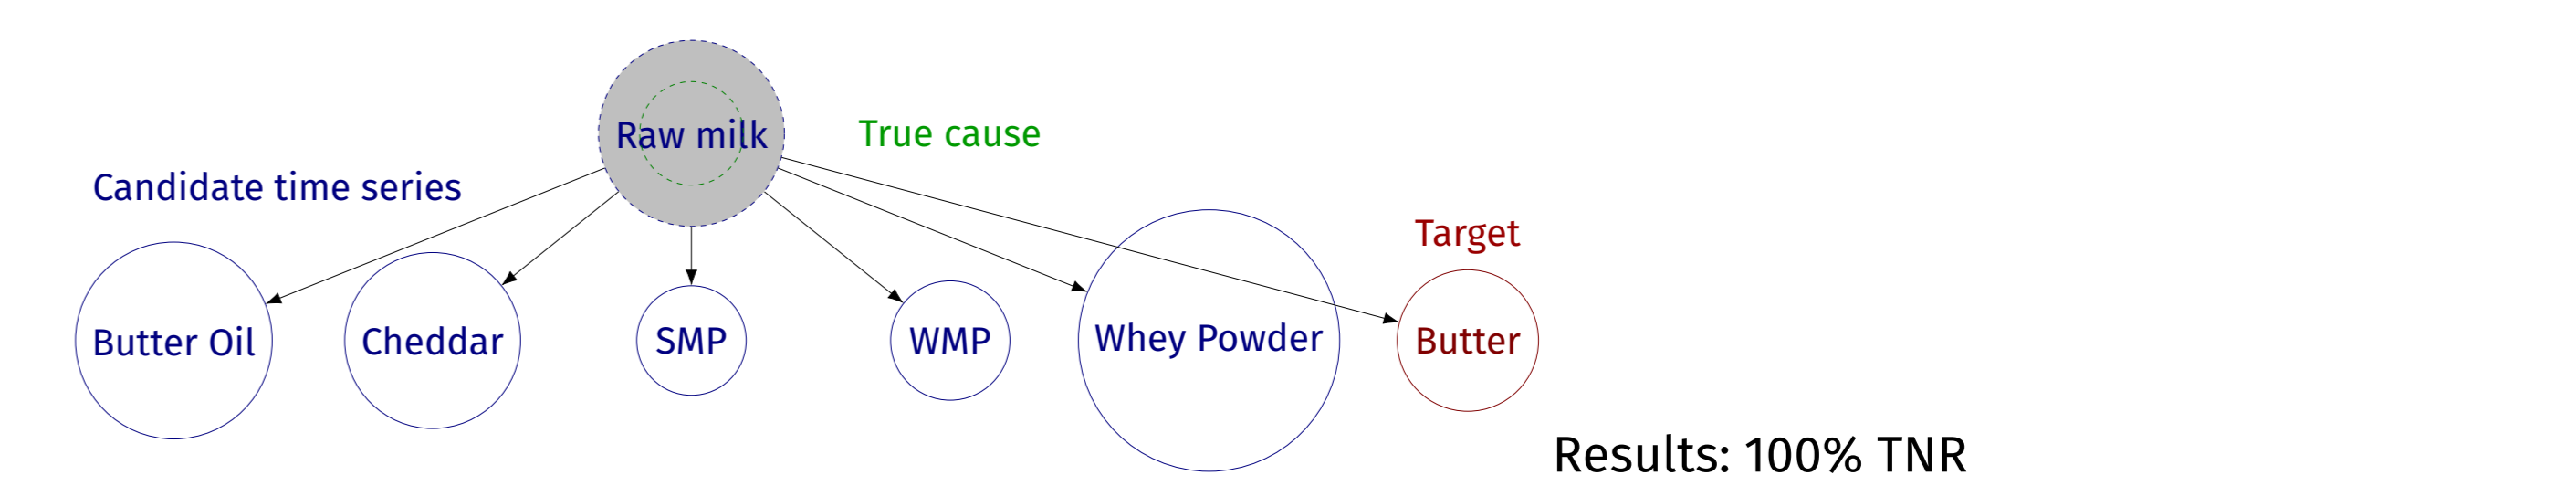

## Conclusion

### Findings

- Our method addresses one of the key problems of causal time series analysis: **distinguish causal influence from confounding**.
- Algorithm **scales linearly** with the number of time series
- Both necessary and sufficient conditions
- Successful application on simulated and real data
- Conditioning set efficient in terms of SNR

### Future work

- Simplify some of the graph constraints
- Extend for multiple lags (not necessary conditions for multiple lags so far)

## References

- D. Entner and P. O. Hoyer. On causal discovery from time series data using FCI. *Probabilistic graphical models*, pages 121–128, 2010.
- C. W. J. Granger. Investigating causal relations by econometric models and crossspectral methods. *Econometrica*, 37:424–438, 1969.
- L. Henckel, E. Perković, and M. H. Maathuis. Graphical criteria for efficient total effect estimation via adjustment in causal linear models. *arXiv*, 2019.
- D. Malinsky and P. Spirtes. Causal structure learning from multivariate time series in settings with unmeasured confounding. In *Proceedings of 2018 ACM SIGKDD Workshop on Causal Discovery*, volume 92 of *Proceedings of Machine Learning Research*, pages 23–47, 2018.
- A. Mastakouri, B. Schölkopf, and D. Janzing. Selecting causal brain features with a single conditional independence test per feature. In *Advances in Neural Information Processing Systems* 32, 2019.
- N. Pfister, P. Bühlmann, and J. Peters. Invariant causal prediction for sequential data. *Journal of the American Statistical Association*, 114(527):1264–1276, 2019.
- J. Runge, P. Nowack, M. Kretschmer, S. Flaxman, and D. Sejdinovic. Detecting and quantifying causal associations in large nonlinear time series datasets. *Science Advances*, 5(11):eaau4996, 2019.
